# Supplementary material for: Association between acne and smoking: systematic review and meta-analysis of observational studies
Source: PubMed Central journal article supplement — Chin Med J (Engl). 2021 Jan 5;134(15):1887–8. doi: 10.1097/CM9.0000000000001286 (PMC8367059; doi:10.1097/cm9.0000000000001286), 2021-01-05

**Supplementary Figure 1:** Flow diagram of the study identification.

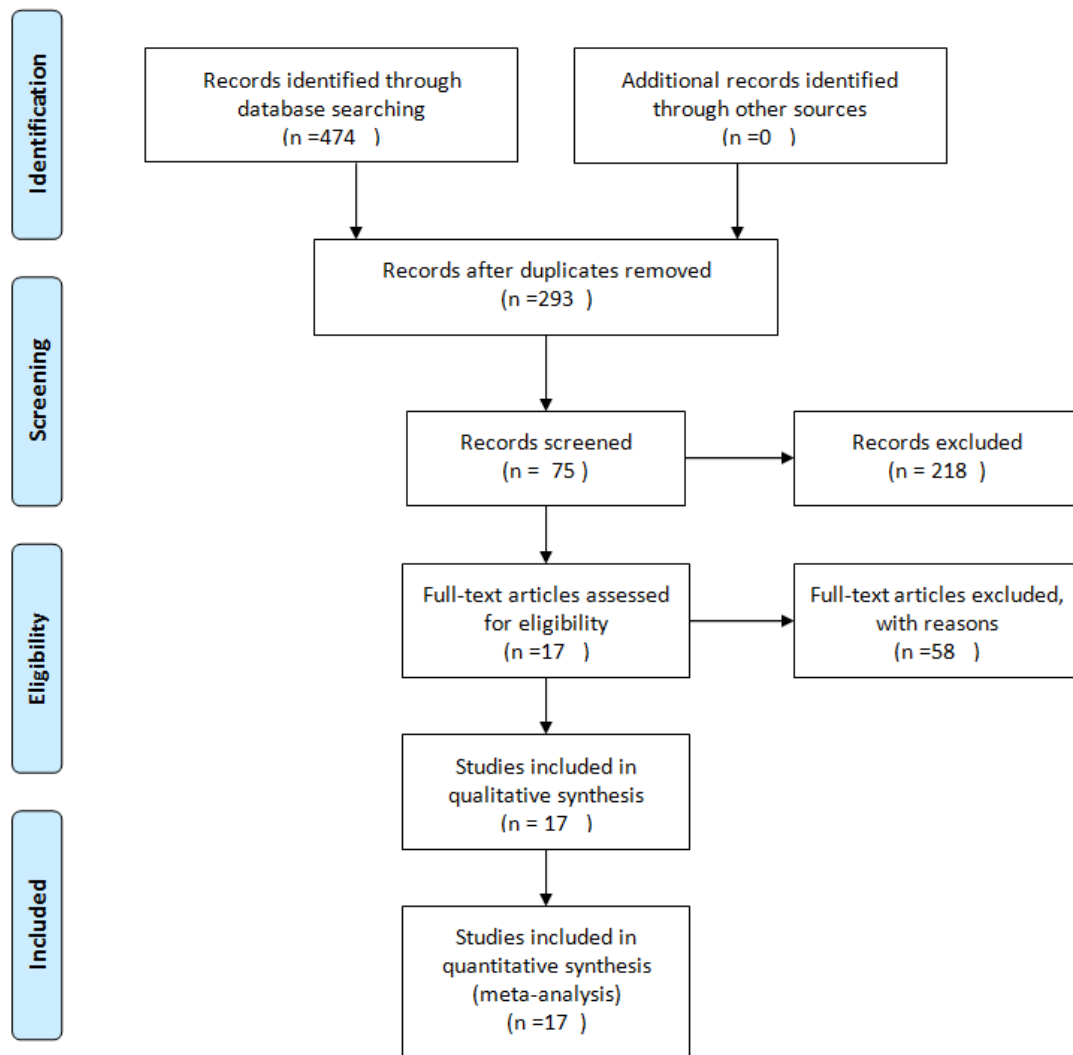

**Supplementary Figure 2:** Forest plot of the pooled odds ratio (ORs) of smoking in acne patients compared with patients without acne.

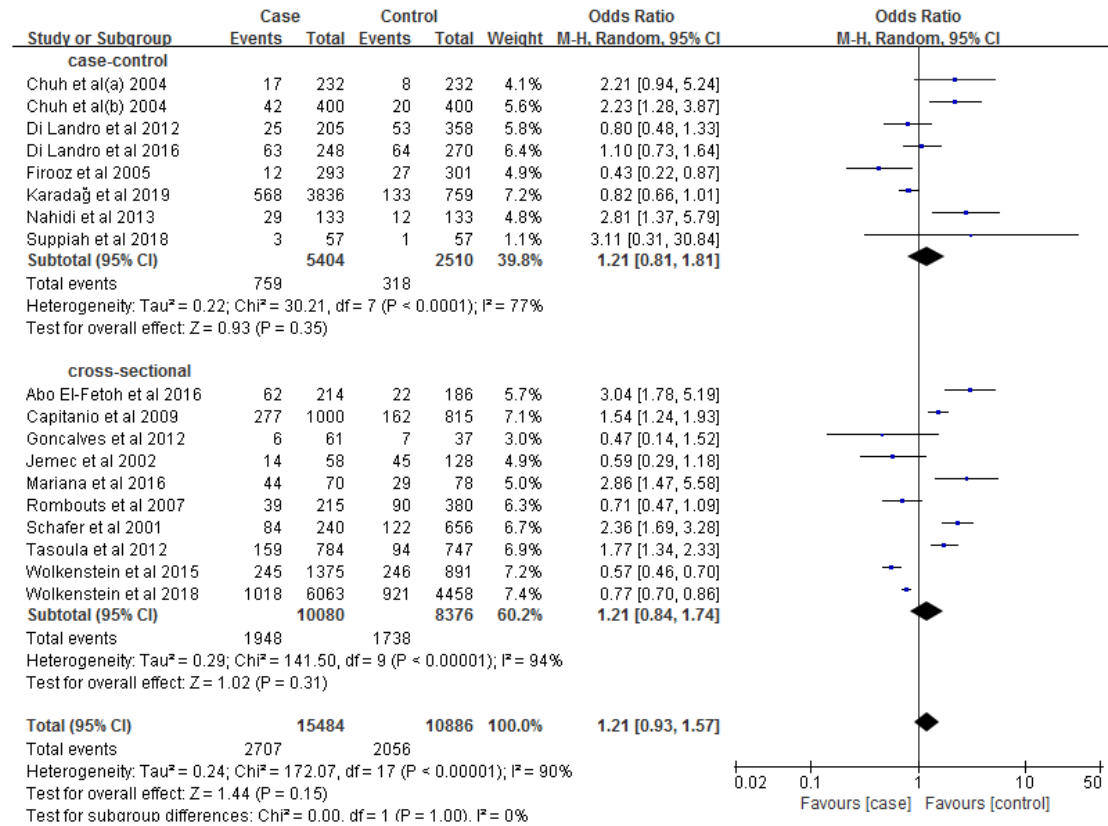

**Supplementary Figure 3:** Forest plot of the pooled odds ratio (ORs) of smoking in acne patients compared with patients without acne based on different ages.

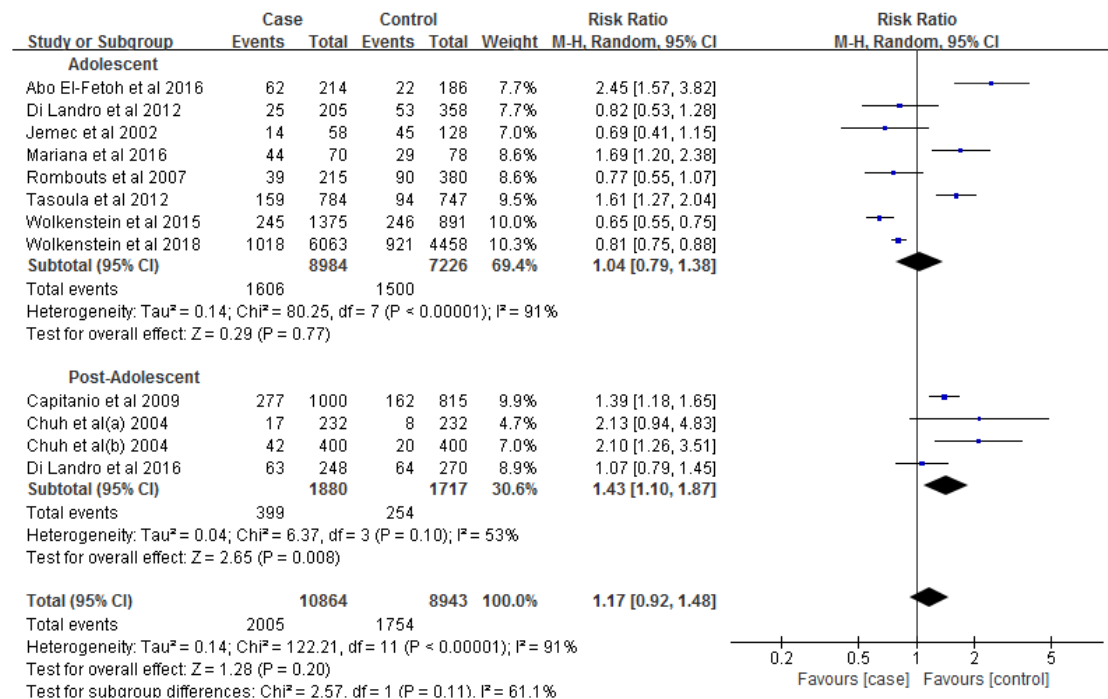

**Supplementary Figure 4:** Forest plot of the pooled odds ratio (ORs) of smoking in acne patients compared with patients without acne based on different geographic areas.

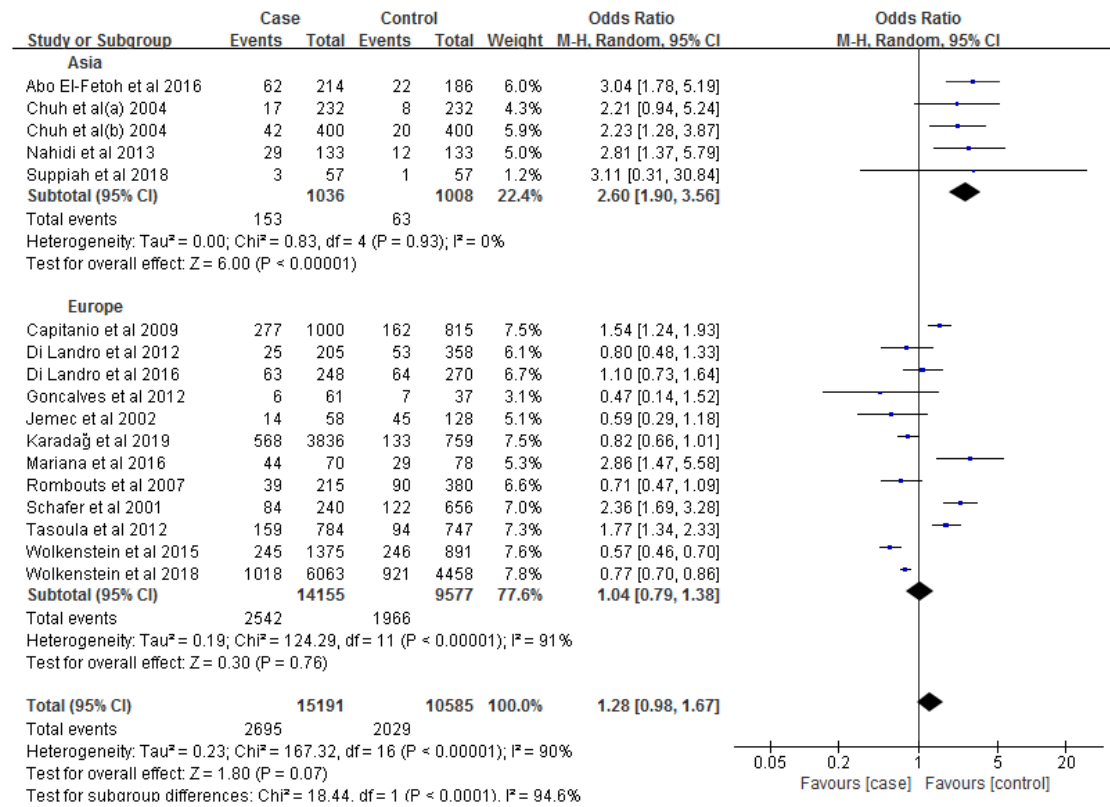

Supplement: cm9-134-1887-s001.pdf [file cm9-134-1887-s001.pdf]
