# Supplementary material for: Association between acne and smoking: systematic review and meta-analysis of observational studies
Source: PubMed Central journal article supplement — Chin Med J (Engl). 2021 Jan 5;134(15):1887–8. doi: 10.1097/CM9.0000000000001286 (PMC8367059; doi:10.1097/cm9.0000000000001286), 2021-01-05
Supplement: cm9-134-1887-s002.pdf [file cm9-134-1887-s002.pdf]

**Supplementary Table 1: Characteristics of all the included studies.**

| Author                         | Year of publication | Region                  | Study design    | Sample |          | Gender | Age (years) | AHRQ score | NOS score             |
|--------------------------------|---------------------|-------------------------|-----------------|--------|----------|--------|-------------|------------|-----------------------|
|                                |                     |                         |                 | Acne   | Non-acne |        |             |            |                       |
| Abo El-Fetoh <i>et al</i>      | 2016                | Kingdom of Saudi Arabia | Cross-sectional | 214    | 186      | M      | 15.0 ± 1.2  | 5          | –                     |
| Capitanio <i>et al</i>         | 2009                | Italy                   | Cross-sectional | 1000   | 815      | F      | 34.6*       | 6          | –                     |
| Chuh <i>et al</i> <sup>a</sup> | 2004                | Hong Kong, China        | Case-control    | 232    | 232      | M, F   | 32.1        | –          | 7                     |
| Chuh <i>et al</i> <sup>b</sup> | 2004                | India                   | Case-control    | 400    | 400      | M, F   | 31.0        | –          | 7                     |
| Di Landro <i>et al</i>         | 2012                | Italy                   | Case-control    | 205    | 358      | M, F   | 17.2 ± 3.1  | –          | 6                     |
| Di Landro <i>et al</i>         | 2016                | Italy                   | Case-control    | 248    | 270      | F      | ≥25         | –          | 6                     |
| Firooz <i>et al</i>            | 2005                | Iran                    | Case-control    | 293    | 301      | M, F   | 15–40       | –          | 5                     |
| Goncalves <i>et al</i>         | 2012                | Portugal                | Cross-sectional | 61     | 37       | M, F   | 22–35       | 5          | –                     |
| Jemec <i>et al</i>             | 2002                | Denmark                 | Cross-sectional | 81     | 105      | M, F   | 15–22       | 6          | –                     |
| Karadağ <i>et al</i>           | 2019                | Turkey                  | Case-control    | 3836   | 759      | M, F   | ≥12         | –          | 6                     |
| Mariana <i>et al</i>           | 2016                | Romania                 | Cross-sectional | 70     | 78       | M, F   | 17.7 ± 0.8  | 5          | –                     |
| Nahidi <i>et al</i>            | 2013                | Iran                    | Case-control    | 133    | 133      | M      | N/A         | –          | Full text unavailable |
| Rombouts <i>et al</i>          | 2007                | Netherlands             | Cross-sectional | 215    | 380      | M, F   | 14–18       | 6          | –                     |
| Schafer <i>et al</i>           | 2001                | Germany                 | Cross-sectional | 220    | 527      | M, F   | 1–87        | 6          | –                     |
| Suppiah <i>et al</i>           | 2018                | Malaysia                | Case-control    | 57     | 57       | M, F   | ≥14         | –          | 4                     |
| Tasoula <i>et al</i>           | 2012                | Greece                  | Cross-sectional | 784    | 747      | M, F   | 11–19       | 6          | –                     |
| Wolkenstein <i>et al</i>       | 2015                | France                  | Cross-sectional | 1375   | 891      | M, F   | 15–24       | 5          | –                     |
| Wolkenstein <i>et al</i>       | 2018                | European                | Cross-sectional | 6063   | 4458     | M, F   | 15–24       | 5          | –                     |

<sup>a</sup>Study in Hong Kong, China; <sup>b</sup>Study in India; F: Female; M: Male; AHRQ: Agency for Healthcare Research and Quality; NOS: Newcastle-Ottawa Scale.
